# Supplementary material for: Basal hypersecretion of glucagon and insulin from palmitate-exposed human islets depends on FFAR1 but not decreased somatostatin secretion
Source: PubMed Central journal article supplement (PMC5498543; doi:10.1038/s41598-017-04730-5), 2017-07-05
Supplement: 41598_2017_4730_MOESM1_ESM.pdf [file 41598_2017_4730_MOESM1_ESM.pdf]

# Basal hypersecretion of glucagon and insulin from palmitate-exposed human islets depends on FFAR1 but not decreased somatostatin secretion

<sup>1</sup>Kristinsson H\*, <sup>1</sup>Sargsyan E, <sup>1</sup>Manell H, <sup>2</sup>Smith DM, <sup>3</sup>Göpel SO and <sup>1</sup>Bergsten P

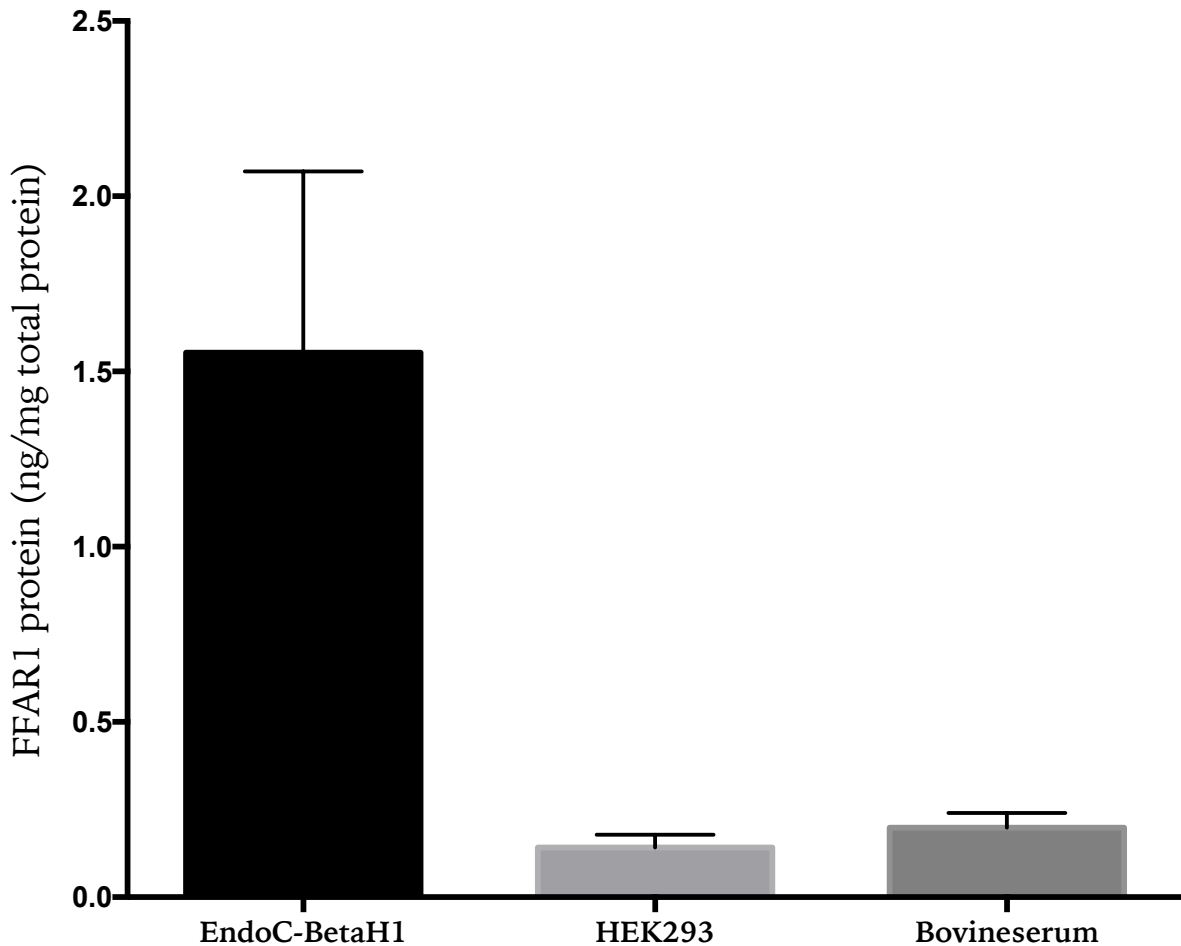

**Supplementary Figure S1. Negative control for FFAR1 protein assay.** FFAR1 protein reactivity from lysates of EndoC-betaH1 beta cells, HEK293 cells and from concentrated bovine serum.
